# Supplementary material for: Binding blockade between TLN1 and integrin β1 represses triple-negative breast cancer
Source: eLife journal article supplement (doi:10.7554/elife.68481), 2022-03-08
Supplement: fig1-data1 [file 1A source data.docx]

This part of the data is based on TCGA dataset analysis on the UALCAN website (http://ualcan.path.uab.edu/).
