# Supplementary material for: Binding blockade between TLN1 and integrin β1 represses triple-negative breast cancer
Source: eLife journal article supplement (doi:10.7554/elife.68481), 2022-03-08
Supplement: fig1-data1 [file Figure 1-source data 4.xlsx]

## Sheet: Sheet1
年龄	病理类型	T分期	N分组	N分组0-1	TLAN1分组	ER分组	PR分组	HER-2分组	分子分型	Ki67分组	DFS时间	生存状态
44	1	2	0	0	0	0	0	0	0	1	75	0
73	1	2	2	1	0	0	0	0	0	0	65	1
40	1	1	1	1	0	0	0	0	0	1	57	0
54	1	2	0	0	0	0	0	0	0	0	47	0
56	1	1	0	0	0	0	1	0	2	0	58	0
66	1	1	0	0	0	0	0	0	0	0	74	0
48	1	1	0	0	0	0	0	0	0	0	75	0
61	1	1	2	1	0	0	1	0	2	0	43	1
35	1	1	0	0	0	0	0	0	0	0	75	0
52	3	1	0	0	0	0	0	0	0	0	76	0
52	1	1	0	0	0	0	0	0	0	0	70	0
56	1	1	2	1	0	0	1	0	2	0	58	0
50	1	2	0	0	0	0	1	0	2	0	75	0
29	1	1	0	0	0	0	0	0	0	0	75	0
38	1	2	0	0	0	0	1	0	2	1	74	0
50	3	2	0	0	0	0	1	0	2	0	57	0
50	1	1	0	0	0	0	1	0	2	0	58	0
47	1	2	0	0	0	0	1	0	2	1	12	1
50	1	2	0	0	0	0	0	0	0	1	58	1
56	1	1	0	0	0	0	1	0	2	0	55	1
54	1	2	0	0	0	0	0	0	0	0	77	0
41	3	1	3	1	1	0	0	0	0	0	53	0
71	1	2	1	1	1	0	0	0	0	0	57	1
52	2	2	0	0	1	0	0	0	0	0	75	0
78	1	2	0	0	1	0	1	0	2	0	9	1
44	1	1	1	1	1	0	0	0	0	0	76	0
38	1	1	1	1	1	0	1	0	2	0	58	1
44	1	1	1	1	1	0	0	0	0	0	74	0
33	1	2	1	1	1	0	0	0	0	0	63	1
65	1	1	2	1	1	0	1	0	2	1	57	0
53	1	2	2	1	1	0	0	0	0	1	52	1
51	2	2	2	1	1	0	0	0	0	0	54	0
42	1	2	2	1	1	0	1	0	2	0	55	1
51	3	2	0	0	1	0	1	0	2	0	51	1
49	1	1	0	0	1	0	0	0	0	0	62	1
37	1	1	0	0	1	0	0	0	0	0	62	1
49	1	2	0	0	1	0	0	0	0	0	42	1
37	1	1	0	0	1	0	1	0	2	1	30	1
49	1	2	0	0	1	0	1	0	2	0	76	0
51	1	2	0	0	1	0	1	0	2	0	57	0
35	3	1	0	0	1	0	0	0	0	0	58	0
53	1	1	0	0	0	0	0	0	0	0	71	1
51	1	1	0	0	0	0	0	0	0	0	71	0
42	2	1	0	0	0	0	0	0	0	0	62	0
51	3	1	0	0	0	0	0	0	0	0	57	0
44	1	2	0	0	0	0	0	0	0	1	75	0
73	1	2	2	1	0	0	0	0	0	0	65	1
40	1	1	1	1	0	0	0	0	0	1	57	0
54	1	2	0	0	0	0	0	0	0	0	47	0
56	1	1	0	0	0	0	1	0	2	0	58	0
66	1	1	0	0	0	0	0	0	0	0	74	0
48	1	1	0	0	0	0	0	0	0	0	75	0
61	1	1	2	1	0	0	1	0	2	0	43	1
35	1	1	0	0	0	0	0	0	0	0	75	0
52	3	1	0	0	0	0	0	0	0	0	76	0
52	1	1	0	0	0	0	0	0	0	0	70	0
56	1	1	2	1	0	0	1	0	2	0	58	0
50	1	2	0	0	0	0	1	0	2	0	75	0
29	1	1	0	0	0	0	0	0	0	0	75	0
38	1	2	0	0	0	0	1	0	2	1	74	0
50	3	2	0	0	0	0	1	0	2	0	57	0
50	1	1	0	0	0	0	1	0	2	0	58	0
47	1	2	0	0	0	0	1	0	2	1	12	1
50	1	2	0	0	0	0	0	0	0	1	58	1
56	1	1	0	0	0	0	1	0	2	0	55	1
54	1	2	0	0	0	0	0	0	0	0	77	0
41	3	1	3	1	1	0	0	0	0	0	53	0
71	1	2	1	1	1	0	0	0	0	0	57	1
52	2	2	0	0	1	0	0	0	0	0	75	0
78	1	2	0	0	1	0	1	0	2	0	9	1
44	1	1	1	1	1	0	0	0	0	0	76	0
38	1	1	1	1	1	0	1	0	2	0	58	1
44	1	1	1	1	1	0	0	0	0	0	74	0
33	1	2	1	1	1	0	0	0	0	0	63	1
65	1	1	2	1	1	0	1	0	2	1	57	0
53	1	2	2	1	1	0	0	0	0	1	52	1
51	2	2	2	1	1	0	0	0	0	0	54	0
42	1	2	2	1	1	0	1	0	2	0	55	1
51	3	2	0	0	1	0	1	0	2	0	51	1
49	1	1	0	0	1	0	0	0	0	0	62	1
37	1	1	0	0	1	0	0	0	0	0	62	1
49	1	2	0	0	1	0	0	0	0	0	42	1
37	1	1	0	0	1	0	1	0	2	1	30	1
49	1	2	0	0	1	0	1	0	2	0	76	0
51	1	2	0	0	1	0	1	0	2	0	57	0
35	3	1	0	0	1	0	0	0	0	0	58	0
53	2	1	0	0	0	0	0	0	0	0	71	1
51	2	1	0	0	0	0	0	0	0	0	71	0
42	1	1	0	0	0	0	0	0	0	0	62	0
51	2	1	0	0	0	0	0	0	0	0	57	0
44	1	2	0	0	0	0	0	0	0	1	75	0
73	1	2	2	1	0	0	0	0	0	0	65	1
40	1	1	1	1	0	0	0	0	0	1	57	0
54	1	2	0	0	0	0	0	0	0	0	47	0
56	1	1	0	0	0	0	1	0	2	0	58	0
66	1	1	0	0	0	0	0	0	0	0	74	0
48	1	1	0	0	0	0	0	0	0	0	75	0
61	1	1	2	1	0	0	1	0	2	0	43	1
35	1	1	0	0	0	0	0	0	0	0	75	0
52	3	1	0	0	0	0	0	0	0	0	76	0
52	1	1	0	0	0	0	0	0	0	0	70	0
56	1	1	2	1	0	0	1	0	2	0	58	0
50	1	2	0	0	0	0	1	0	2	0	75	0
29	1	1	0	0	0	0	0	0	0	0	75	0
38	1	2	0	0	0	0	1	0	2	1	74	0
50	3	2	0	0	0	0	1	0	2	0	57	0
50	1	1	0	0	0	0	1	0	2	0	58	0
47	1	2	0	0	0	0	1	0	2	1	12	1
50	1	2	0	0	0	0	0	0	0	1	58	1
56	1	1	0	0	0	0	1	0	2	0	55	1
54	1	2	0	0	0	0	0	0	0	0	77	0
41	3	1	3	1	1	0	0	0	0	0	53	0
71	1	2	1	1	1	0	0	0	0	0	57	1
52	2	2	0	0	1	0	0	0	0	0	75	0
78	1	2	0	0	1	0	1	0	2	0	9	1
44	1	1	1	1	1	0	0	0	0	0	76	0
38	1	1	1	1	1	0	1	0	2	0	58	1
44	1	1	1	1	1	0	0	0	0	0	74	0
33	1	2	1	1	1	0	0	0	0	0	63	1
65	1	1	2	1	1	0	1	0	2	1	57	0
53	1	2	2	1	1	0	0	0	0	1	52	1
51	2	2	2	1	1	0	0	0	0	0	54	0
42	1	2	2	1	1	0	1	0	2	0	55	1
51	3	2	0	0	1	0	1	0	2	0	51	1
49	1	1	0	0	1	0	0	0	0	0	62	1
37	1	1	0	0	1	0	0	0	0	0	62	1
49	1	2	0	0	1	0	0	0	0	0	42	1
37	1	1	0	0	1	0	1	0	2	1	30	1
49	1	2	0	0	1	0	1	0	2	0	76	0
51	1	2	0	0	1	0	1	0	2	0	57	0
35	3	1	0	0	1	0	0	0	0	0	58	0
53	2	1	0	0	0	0	0	0	0	0	71	1
51	1	1	0	0	0	0	0	0	0	0	71	0
42	1	1	0	0	0	0	0	0	0	0	62	0
51	2	1	0	0	0	0	0	0	0	0	57	0
44	1	2	0	0	0	0	0	0	0	1	75	0
73	1	2	2	1	0	0	0	0	0	0	65	1
40	1	1	1	1	0	0	0	0	0	1	57	0
54	1	2	0	0	0	0	0	0	0	0	47	0
56	1	1	0	0	0	0	1	0	2	0	58	0
66	1	1	0	0	0	0	0	0	0	0	74	0
48	1	1	0	0	0	0	0	0	0	0	75	0
61	1	1	2	1	0	0	1	0	2	0	43	1
35	1	1	0	0	0	0	0	0	0	0	75	0
52	3	1	0	0	0	0	0	0	0	0	76	0
52	1	1	0	0	0	0	0	0	0	0	70	0
56	1	1	2	1	0	0	1	0	2	0	58	0
50	1	2	0	0	0	0	1	0	2	0	75	0
29	1	1	0	0	0	0	0	0	0	0	75	0
38	1	2	0	0	0	0	1	0	2	1	74	0
50	3	2	0	0	0	0	1	0	2	0	57	0
50	1	1	0	0	0	0	1	0	2	0	58	0
47	1	2	0	0	0	0	1	0	2	1	12	1
50	1	2	0	0	0	0	0	0	0	1	58	1
56	1	1	0	0	0	0	1	0	2	0	55	1
54	1	2	0	0	0	0	0	0	0	0	77	0
41	3	1	3	1	1	0	0	0	0	0	53	0
71	1	2	1	1	1	0	0	0	0	0	57	1
52	2	2	0	0	1	0	0	0	0	0	75	0
78	1	2	0	0	1	0	1	0	2	0	9	1
44	1	1	1	1	1	0	0	0	0	0	76	0
38	1	1	1	1	1	0	1	0	2	0	58	1
44	1	1	1	1	1	0	0	0	0	0	74	0
33	1	2	1	1	1	0	0	0	0	0	63	1
65	1	1	2	1	1	0	1	0	2	1	57	0
53	1	2	2	1	1	0	0	0	0	1	52	1
51	2	2	2	1	1	0	0	0	0	0	54	0
42	1	2	2	1	1	0	1	0	2	0	55	1
51	3	2	0	0	1	0	1	0	2	0	51	1
49	1	1	0	0	1	0	0	0	0	0	62	1
37	1	1	0	0	1	0	0	0	0	0	62	1

## Sheet: Sheet2
		TLN1 low	TLN1 high
	T1-2	60	36
	T3-4	34	41
	N0	80	35
	N+	16	40
	Ki67-	76	64
	Ki67+	20	11
