# Supplementary material for: Binding blockade between TLN1 and integrin β1 represses triple-negative breast cancer
Source: eLife journal article supplement (doi:10.7554/elife.68481), 2022-03-08
Supplement: fig1-data1 [file TLN1组织wb.xlsx]

## Sheet: Sheet1
	Para-tumor	Tumor
1	0.360328	0.933127
2	0.343271	1.21477
3	0.270536	0.726468
4	0.16175	2.58544
5	0.192935	2.1663
