# Supplementary material for: Binding blockade between TLN1 and integrin β1 represses triple-negative breast cancer
Source: eLife journal article supplement (doi:10.7554/elife.68481), 2022-03-08
Supplement: fig1-figsupp1-data1 [file Figure 1-figure supplement 1 souce data 1.docx]

A-B

This part of the data is based on TIMER2.0 dataset on the TIMER website (<http://timer.cistrome.org/>).

C-D

This part of the data is based on TCGA dataset analysis on the UALCAN website (http://ualcan.path.uab.edu/).
