# Supplementary material for: Binding blockade between TLN1 and integrin β1 represses triple-negative breast cancer
Source: eLife journal article supplement (doi:10.7554/elife.68481), 2022-03-08
Supplement: fig2-data1 [file apoptosis analysis.xlsx]

## Sheet: Sheet1
		231/NC			shTalin1
	apoptosis	5.08	5.17	5.67	7.17	7.72	6.77
