# Supplementary material for: Binding blockade between TLN1 and integrin β1 represses triple-negative breast cancer
Source: eLife journal article supplement (doi:10.7554/elife.68481), 2022-03-08
Supplement: fig2-data1 [file EdU analysis.xlsx]

## Sheet: Sheet1
		231/NC				231/shTalin1
	0	14.63	9.52	10.64	12.5	9.52	9.52	10.64	12.5
	24	45.19	35.71	35.78	43.48	37.37	32.39	37.27	35
	48	15.08	22.46	20.3	20.13	14.62	15.38	14.05	13.76
	72	11.48	16.16	11.64	14.1	5.41	5.47	7.32	7.11
