# Supplementary material for: Binding blockade between TLN1 and integrin β1 represses triple-negative breast cancer
Source: eLife journal article supplement (doi:10.7554/elife.68481), 2022-03-08
Supplement: fig2-data1 [file xenograft.xlsx]

## Sheet: Sheet1
Xenograft tumor volume		days	231/NC					231/shTALIN1
	1	1	0	0	0	0	0	0	0	0	0	0
	4	4	54.65	87.83	124.52	101.43	111.03	42.56	28.4	34.43	79.54	74.68
	7	7	105.17	181.17	218.58	216.45	261.61	115.49	94.64	74.63	164.63	153.5
	11	11	246.36	240.08	357.4	407.65	416.2	157.62	137.86	134.22	202.58	307.07
	14	14	498.52	495.64	573.92	694.56	640.34	231.79	297.3	257.09	427.01	465.72
	18	18	745.03	592.54	830.63	829.52	1043.45	485.43	385.64	383.45	683.24	610.43
	21	21	839.34	659.54	1032.54	749.02	1142.53	638.5	423.64	482.54	745.42	649.23
tumor weight	231/NC	shTalin1
	3.837	1.528
	4.435	1.894
	3.726	2.042
	2.842	2.194
	3.672	2.532
tumor size	231/NC	shTalin1
	1.345	0.213
	1.264	0.532
	1.183	0.634
	1.023	0.235
	0.673	0.143
