# Supplementary material for: Binding blockade between TLN1 and integrin β1 represses triple-negative breast cancer
Source: eLife journal article supplement (doi:10.7554/elife.68481), 2022-03-08
Supplement: fig3-data1 [file 3A source data.xlsx]

## Sheet: Sheet1
	NC	shTLN1
	73.1	42.5
	70.5	47.6
	74.8	44.3
	75.8	51.2
