# Supplementary material for: Binding blockade between TLN1 and integrin β1 represses triple-negative breast cancer
Source: eLife journal article supplement (doi:10.7554/elife.68481), 2022-03-08
Supplement: fig3-data1 [file adhesion--shTLN1 Integrin b1 OE.xlsx]

## Sheet: Sheet1
shTLN1	ITGB OE
48.315	65.123
32.339	60.353
35.341	67.449
