# Supplementary material for: Binding blockade between TLN1 and integrin β1 represses triple-negative breast cancer
Source: eLife journal article supplement (doi:10.7554/elife.68481), 2022-03-08
Supplement: fig3-data1 [file EMT.xlsx]

## Sheet: Sheet1
		231/NC		shTalin1
	CK18	0.283115	0.303907	0.58082	0.562603
	E-cadherin	0.0348664	0.0461716	0.64238	0.628251
	N-cadherin	0.224683	0.196842	0.0428109	0.0210352
	Vimentin	0.879717	0.899432	0.44975	0.426987
