# Supplementary material for: Binding blockade between TLN1 and integrin β1 represses triple-negative breast cancer
Source: eLife journal article supplement (doi:10.7554/elife.68481), 2022-03-08
Supplement: fig3-data1 [file lung metastasis.xlsx]

## Sheet: 肺转移number
	231/NC	shTalin1
	10	0
	8	0
	6	1
	9	2
	11	1

## Sheet: 肺转移size
231/NC	shTalin1
1.2	0
1	0
0.5	0
1.3	0
1.8	0
2	0
0.5	0
0.4	0
1.2	0
1.3	0
1.1	0.6
1.4	0
0.6	0
0.9	0
1.1	0.2
1.6	0
1	0
0.5	0
1.4	0
1.7	0
0.5	0
2	0.8
2.3	0
1.1	0
0.8	0
0.5	0
1	0
1.1	0
1.7	0
0.6	0
0.7	0
1.2	0
1.3	0
0.5	0
