# Supplementary material for: Binding blockade between TLN1 and integrin β1 represses triple-negative breast cancer
Source: eLife journal article supplement (doi:10.7554/elife.68481), 2022-03-08
Supplement: fig3-data1 [file transwell--shTLN1 Integrin b1 OE.xlsx]

## Sheet: Sheet1
			shTLN1			Integrin b1 OE
		Invasion	91	121	107	453	410	392
		Migration	239	183	324	639	601	578
