# Supplementary material for: Binding blockade between TLN1 and integrin β1 represses triple-negative breast cancer
Source: eLife journal article supplement (doi:10.7554/elife.68481), 2022-03-08
Supplement: fig3-data1 [file transwell-计数.xlsx]

## Sheet: Sheet1
			231/NC			shTLN1
		Invasion	6.24	6.354	6.361	1.61	1.596	1.647
		Migration	9.033	9.187	9.105	3.025	2.998	2.903
