# Supplementary material for: Binding blockade between TLN1 and integrin β1 represses triple-negative breast cancer
Source: eLife journal article supplement (doi:10.7554/elife.68481), 2022-03-08
Supplement: fig3-figsupp1-data1 [file adhesion--BT549 shTLN1.xlsx]

## Sheet: Sheet1
549/NC	shTLN1
68.53	33.42
55.72	27.53
59.89	34.72
