# Supplementary material for: Binding blockade between TLN1 and integrin β1 represses triple-negative breast cancer
Source: eLife journal article supplement (doi:10.7554/elife.68481), 2022-03-08
Supplement: fig3-figsupp1-data1 [file 工作簿5.xlsx]

## Sheet: Sheet1
		549/NC			shTLN1
	Invasion	2.12	2.06	2.24	1.08	1.13	0.92
	Migration	2.54	2.69	2.48	1.36	1.41	1.18
