# Supplementary material for: Binding blockade between TLN1 and integrin β1 represses triple-negative breast cancer
Source: eLife journal article supplement (doi:10.7554/elife.68481), 2022-03-08
Supplement: fig3-figsupp2-data1 [file Figure S3-source data 2.xlsx]

## Sheet: Cellular Component
	Protein Numbers
photoreceptor disc membrane	1
BRCA1-BARD1 complex	1
axonemal dynein complex	1
U12-type spliceosomal complex	2
Set1C/COMPASS complex	2
photoreceptor outer segment	2
photoreceptor cell cilium	2
non-motile cilium	2
ciliary transition zone	2
centriole	2
9+0 non-motile cilium	2
microtubule organizing center part	3
methyltransferase complex	3
histone methyltransferase complex	3
nucleosome	4
DNA packaging complex	4
cilium	4
ciliary part	4
protein-DNA complex	5
microtubule organizing center	8

## Sheet: Biological Process
	Protein Numbers
positive regulation of cell migration by vascular endothelial growth factor signaling pathway	1
photoreceptor cell maintenance	1
cellular response to antibiotic	1
regulation of blood vessel endothelial cell migration	2
positive regulation of endothelial cell migration	2
positive regulation of blood vessel endothelial cell migration	2
phosphatidylcholine metabolic process	2
columnar/cuboidal epithelial cell differentiation	2
regulation of vasculature development	3
regulation of angiogenesis	3
response to nutrient	4
protein-DNA complex subunit organization	5
protein-DNA complex assembly	5
nucleosome organization	5
nucleosome assembly	5
DNA packaging	5
chromatin assembly or disassembly	5
chromatin assembly	5
translational elongation	6
tissue development	13

## Sheet: Molecular Function
	Protein Numbers
type I interferon receptor binding	1
transferase activity, transferring selenium-containing groups	1
single-stranded DNA-dependent ATPase activity	1
NEDD8 activating enzyme activity	1
K63-linked polyubiquitin binding	1
inositol-1,3,4-trisphosphate 1-phosphatase activity	1
estrogen response element binding	1
aryldialkylphosphatase activity	1
ammonia-lyase activity	1
3-hydroxybutyrate dehydrogenase activity	1
3',5'-cyclic-GMP phosphodiesterase activity	1
transmembrane receptor protein tyrosine kinase activity	2
transmembrane receptor protein kinase activity	2
thiamine pyrophosphate binding	2
histone binding	4
protein kinase activity	11
phosphotransferase activity, alcohol group as acceptor	13
kinase activity	13
zinc ion binding	15
transferase activity, transferring phosphorus-containing groups	16
