# Supplementary material for: Binding blockade between TLN1 and integrin β1 represses triple-negative breast cancer
Source: eLife journal article supplement (doi:10.7554/elife.68481), 2022-03-08
Supplement: fig4-data1 [file 工作簿10.xlsx]

## Sheet: Sheet1
	FA number	231/NC			shTalin1
		37	29	27	11	19	15
	FA size	231/NC			shTalin1
		6	7	10	13	14	11
	cell length	231/NC			shTalin1
		3.5	3	3.2	2.3	1.9	2.2
	actin cortex width	231/NC			shTalin1
		1	2	3	5	7	6
