# Supplementary material for: Binding blockade between TLN1 and integrin β1 represses triple-negative breast cancer
Source: eLife journal article supplement (doi:10.7554/elife.68481), 2022-03-08
Supplement: fig5-data1 [file 231-CCK8.xlsx]

## Sheet: Sheet1
	MDA-MB-231		0µM			2µM
		24	0.8563	0.8234	0.8423	0.713554	0.703013	0.674924
		48h	1.0096	1.0729	1.0593	0.421102	0.605763	0.543313
