# Supplementary material for: Binding blockade between TLN1 and integrin β1 represses triple-negative breast cancer
Source: eLife journal article supplement (doi:10.7554/elife.68481), 2022-03-08
Supplement: fig5-data1 [file 231-IC50.xlsx]

## Sheet: Sheet1
	uM	231
	0.1	92.8097	88.4592	91.3595
	1	67.0764	66.0266	68.064
	2	40.2097	57.8423	51.8792
	5	30.6344	28.278	31.5347
	10	19.3897	24.29	21.9335
	20	10.8561	10.8761	10.5136
