# Supplementary material for: Binding blockade between TLN1 and integrin β1 represses triple-negative breast cancer
Source: eLife journal article supplement (doi:10.7554/elife.68481), 2022-03-08
Supplement: fig5-data1 [file C6 对231-Transwell.xlsx]

## Sheet: Sheet1
	231/NC+DMSO			231/NC+C6
Cell numble	13812	13980	13728	5064	4332	4648
	231/NC+DMSO			231/NC+C6
Cell numble/1000	13.812	13.98	13.728	5.064	4.332	4.648
