# Supplementary material for: Binding blockade between TLN1 and integrin β1 represses triple-negative breast cancer
Source: eLife journal article supplement (doi:10.7554/elife.68481), 2022-03-08
Supplement: fig5-data1 [file C6对231及shTalin作用24H粘附-sls.xlsx]

## Sheet: Sheet1
adhesion%	231+DMSO	231+C6
	75.8	35.2
	73.2	37.3
	74.6	36.9
	74.9	39.8
