# Supplementary material for: Binding blockade between TLN1 and integrin β1 represses triple-negative breast cancer
Source: eLife journal article supplement (doi:10.7554/elife.68481), 2022-03-08
Supplement: fig5-figsupp1-data1 [file BT549-CCK8.xlsx]

## Sheet: Sheet1
	BT549		0µM			5µM
		24	0.8563	0.8443	0.8631	0.656626	0.648181	0.668997
		48h	1.0563	1.1443	1.1631	0.56773	0.496098	0.510551
