# Supplementary material for: Binding blockade between TLN1 and integrin β1 represses triple-negative breast cancer
Source: eLife journal article supplement (doi:10.7554/elife.68481), 2022-03-08
Supplement: fig5-figsupp1-data1 [file BT549-IC50.xlsx]

## Sheet: Sheet1
	uM	BT549
	0.1	95.6681	92.4459	93.3517
	1	80.7632	81.2863	84.0833
	2	60.0964	58.8671	59.8155
	5	50.6344	44.2458	45.5347
	10	40.3803	36.2907	37.9331
	20	23.853	25.8298	26.5525
