# Supplementary material for: Binding blockade between TLN1 and integrin β1 represses triple-negative breast cancer
Source: eLife journal article supplement (doi:10.7554/elife.68481), 2022-03-08
Supplement: fig5-figsupp1-data1 [file C2-C4-C6.xlsx]

## Sheet: Sheet1
		C2 0μM				C2 2μM				C2 5μM				C2 10μM				C2 20μM
	0h	0.701	0.725	0.745	0.695	0.686	0.728	0.718	0.727	0.712	0.729	0.749	0.703	0.719	0.724	0.744	0.713	0.698	0.731	0.749	0.72
	24h		0.771	0.761	0.82		0.716	0.788	0.884	0.925	0.834	0.897	0.84		0.804	0.891	0.953	0.817		0.86	0.929
	48h	0.976	0.994	1.004	1.112	0.918	0.98	0.923		1.006		0.954	1.022	1.113		1.127	1.182	0.929	0.987	0.836	1.077
		C4 0μM				C4 2μM				C4 5μM				C4 10μM				C4 20μM
	0h	0.67	0.699	0.701		0.698	0.723	0.705	0.72	0.692	0.684	0.716	0.72	0.689	0.718	0.71	0.702	0.71		0.689	0.66
	24h	0.802	0.84	0.764		0.868	0.945	0.858			0.881	0.939	0.854		0.729	0.783	0.775	0.675	0.647	0.657	0.694
	48h	0.904	1.083	1.074	0.989	1.004	0.849	1.087	1.063	0.925	1.039	0.961	0.977	0.658	0.618	0.627	0.649	0.632	0.631	0.651	0.641
		C6 0μM				C6 2μM				C6 5μM				C6 10μM				C6 20μM
	0h	0.082	0.085	0.082	0.106	0.075	0.101	0.056		0.079	0.08	0.093	0.097	0.09	0.065	0.082	0.127	0.083		0.054	0.129
	24h		0.22	0.182	0.226	0.121	0.134	0.18	0.214	0.152	0.12	0.146	0.162	0.155		0.127	0.153	0.152		0.133	0.086
	48h	0.577	0.525		0.553	0.254	0.181	0.22	0.328	0.204	0.169	0.156	0.185	0.118	0.134	0.121	0.111	0.071	0.06	0.06	0.058
