# Supplementary material for: Binding blockade between TLN1 and integrin β1 represses triple-negative breast cancer
Source: eLife journal article supplement (doi:10.7554/elife.68481), 2022-03-08
Supplement: fig6-data1 [file elife-68481-fig6-data1-v3.zip]

## Sheet: tumor
days	DMSO					c67399
1	0	0	0	0	0	0	0	0	0	0
4	52.53	86.34	111.52	101.53	122.25	34.45	60.64	40.38	30.22	58.94
7	105.17	181.17	261.61	216.45	218.58	114.36	169.46	115.49	101.48	198.41
11	199.34	237.8	416.2	446.84	356.42	134.22	202.58	157.62	137.86	306.04
14	498.52	495.64	640.34	694.56	573.92	257.09	427.01	231.79	297.3	465.72
18	738.24	592.54	933.53	829.52	830.63	403.62	689.34	485.43	325.64	621.46
21	839.34	748.52	1084.42	749.02	1032.54	432.54	793.52	605.73	384.64	731.47

## Sheet: lung metastasis
number	231/NC	shTALIN1		size mm	231/NC	shTALIN1
	10	0			1.2	0
	8	0			1	0
	6	1			0.5	0
	9	2			1.3	0
	11	1			1.8	0
					2	0
					0.5	0
					0.4	0
					1.2	0
					1.3	0
					1.1	0.6
					1.4	0
					0.6	0
					0.9	0
					1.1	0.2
					1.6	0
					1	0
					0.5	0
					1.4	0
					1.7	0
					0.5	0
					2	0.8
					2.3	0
					1.1	0
					0.8	0
					0.5	0
					1	0
					1.1	0
					1.7	0
					0.6	0
					0.7	0
					1.2	0
					1.3	0
					0.5	0
