# Supplementary material for: Binding blockade between TLN1 and integrin β1 represses triple-negative breast cancer
Source: eLife journal article supplement (doi:10.7554/elife.68481), 2022-03-08
Supplement: fig6-data1 [file lung metastasis.xlsx]

## Sheet: 肺转移number
	dmso	c67399
	10	2
	8	3
	6	1
	9	2
	11	0

## Sheet: 肺转移size
dmso	c67399
0.5	0.1
0.4	0.1
1.2	0.4
1	0.2
0.5	0.1
1.4	0.05
1.7	0.05
0.5	0.1
2	0
2.3
1.1
0.8
0.5
1
1.1
1.7
0.6
0.7
1.2
1.3
0.5
1.3
1.1
1.4
0.6
0.9
1.1
1.6
1.2
1
0.5
1.3
1.8
2
