# Supplementary material for: Binding blockade between TLN1 and integrin β1 represses triple-negative breast cancer
Source: eLife journal article supplement (doi:10.7554/elife.68481), 2022-03-08
Supplement: fig6-figsupp1-data1 [file AST ALT.xlsx]

## Sheet: Sheet1
serum AST	DMSO	C67399
	66	74
	72	65
	62	63
	58	56
	67	64
serum ALT	DMSO	C67399
	20	25
	24	23
	26	27
	18	21
	15	17
