# Supplementary material for: Binding blockade between TLN1 and integrin β1 represses triple-negative breast cancer
Source: eLife journal article supplement (doi:10.7554/elife.68481), 2022-03-08
Supplement: fig6-figsupp1-data1 [file blood cell counts.xlsx]

## Sheet: Sheet1
WBC	DMSO	C67399
	9.5	8.5
	9.2	7.9
	8.8	9.5
	10.1	9.9
	8.4	20.3
RBC	DMSO	C67399
	9.2	5.6
	8.8	8.6
	6.5	9.5
	8.7	7.8
	8.4	5.7
HGB	DMSO	C67399
	11.2	6.5
	14.3	12.3
	13.6	12.7
	14.6	11.2
	12.2	13.4
PLT	DMSO	C67399
	0.44	0.37
	0.81	0.35
	0.42	0.41
	0.18	0.57
	0.45	0.83
Neutrophil	DMSO	C67399
	1.2	1.1
	1.1	1.2
	0.8	0.9
	1.4	0.8
	1.2	1.3
