# Supplementary figures and images for: Binding blockade between TLN1 and integrin β1 represses triple-negative breast cancer
Source: eLife journal article supplement (doi:10.7554/elife.68481), 2022-03-08

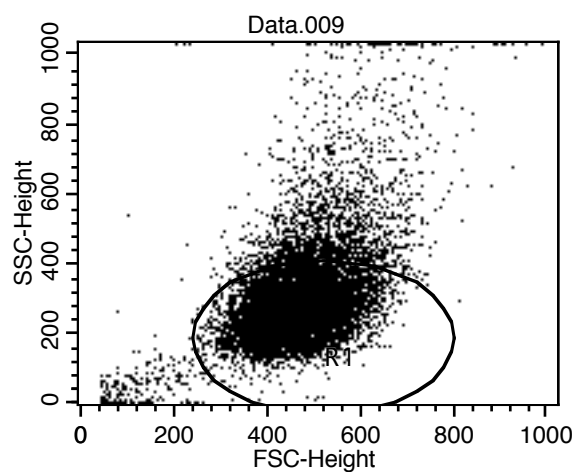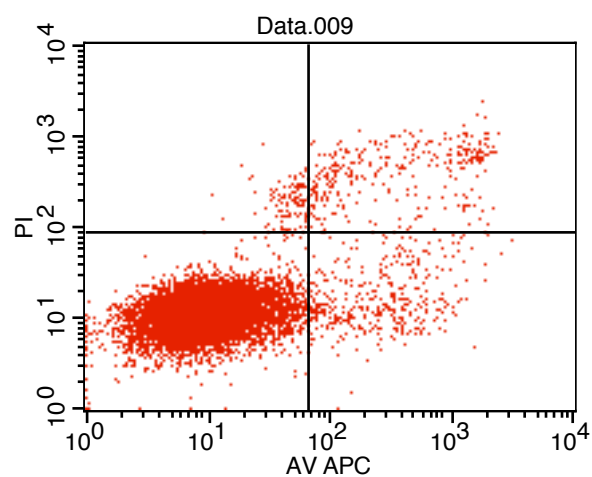

| Quad | Events | % Gated | % Total | X Mean | Y Mean |
|------|--------|---------|---------|--------|--------|
| UL   | 104    | 1.13    | 0.92    | 47.35  | 210.47 |
| UR   | 323    | 3.51    | 2.86    | 653.67 | 489.26 |
| LL   | 8386   | 91.15   | 74.26   | 12.01  | 12.09  |
| LR   | 387    | 4.21    | 3.43    | 351.38 | 20.92  |

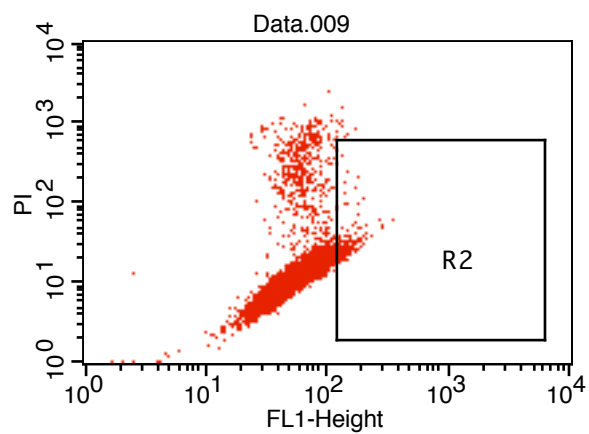

| Region | Events | % Gated | % Total | X Mean | Y Mean |
|--------|--------|---------|---------|--------|--------|
| R1     | 9200   | 100.00  | 81.47   | 58.49  | 31.46  |
| R2     | 195    | 2.12    | 1.73    | 149.01 | 38.13  |

Supplement: fig2-data1 [file elife-68481-fig2-data1-v3.zip]

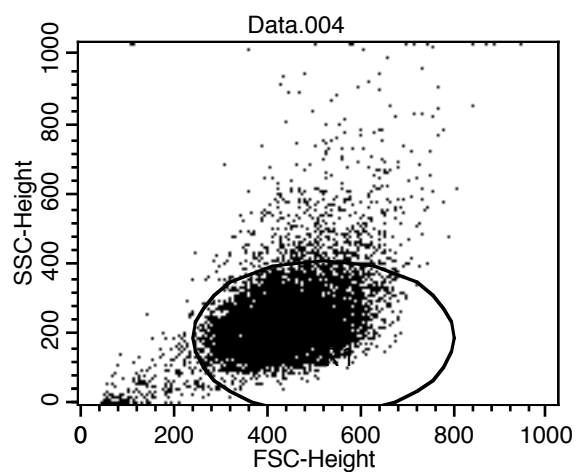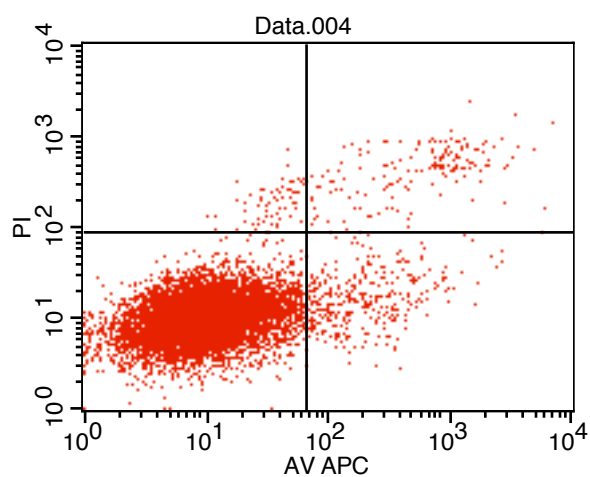

| Quad | Events | % Gated | % Total | X Mean | Y Mean |
|------|--------|---------|---------|--------|--------|
| UL   | 71     | 0.73    | 0.67    | 37.69  | 203.76 |
| UR   | 164    | 1.69    | 1.55    | 913.98 | 499.93 |
| LL   | 9126   | 94.19   | 86.25   | 12.13  | 11.22  |
| LR   | 328    | 3.39    | 3.10    | 297.70 | 19.88  |

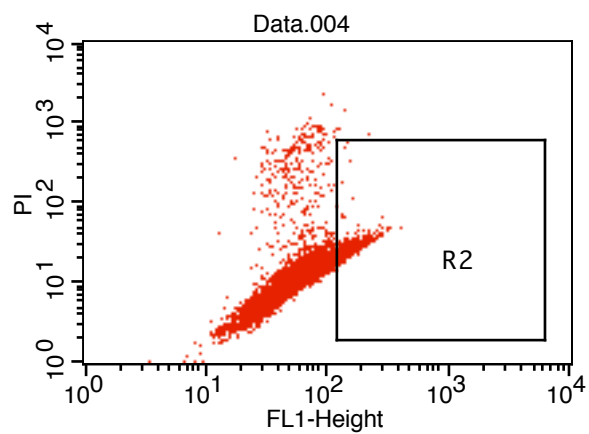

| Region | Events | % Gated | % Total | X Mean | Y Mean |
|--------|--------|---------|---------|--------|--------|
| R1     | 9689   | 100.00  | 91.57   | 58.70  | 21.20  |
| R2     | 495    | 5.11    | 4.68    | 156.69 | 29.94  |

Supplement: fig2-data1 [file elife-68481-fig2-data1-v3.zip]
